# Supplementary material
Source: Research Square preprint supplement (doi:10.21203/rs.3.rs-9287246/v1)
Supplement: Supplementary file 1 [file 512260e8faf2bf3af1e8a9fe.pdf]

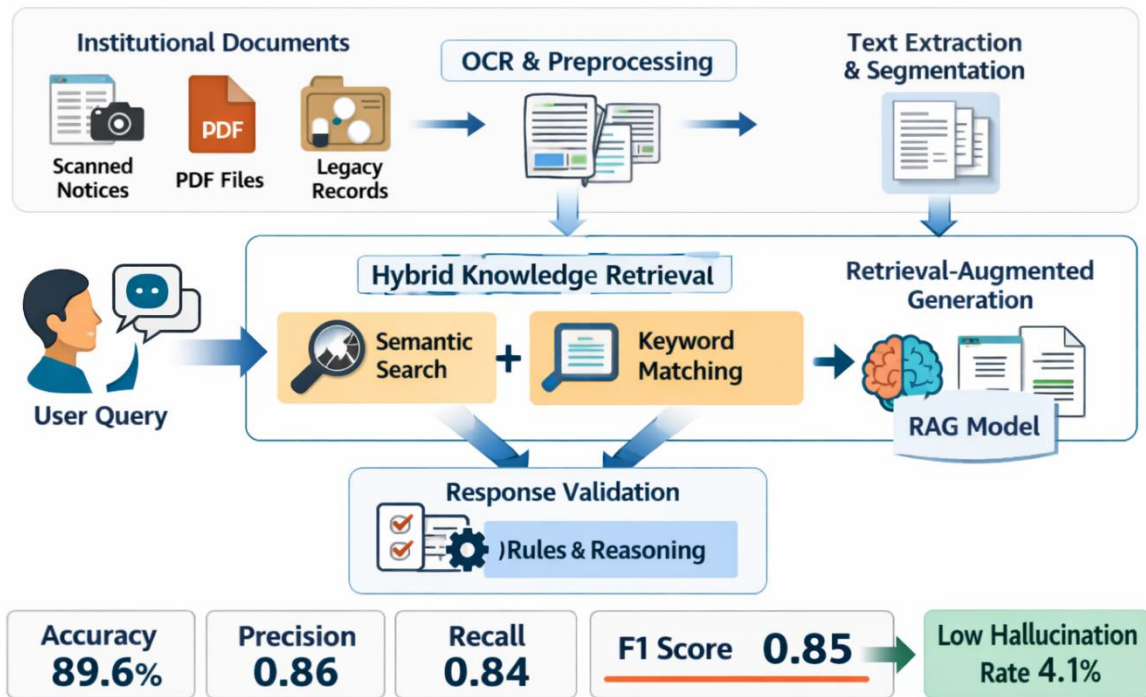

Overview of the proposed knowledge centric conversational framework for academic and campus guidance, integrating OCR based document processing, hybrid knowledge retrieval, and retrieval augmented generation to produce accurate, context aware, and reliable responses from institutional data.
