# Supplementary material
Source: Research Square preprint supplement (doi:10.21203/rs.3.rs-9287246/v1)
Supplement: Supplementary file 2 [file 7846316564fa4a88064275a7.pdf]

## Author Biographies

**Veerababu Reddy** is currently working as an Associate Professor in the Department of Information Technology at Vignan's Lara Institute of Technology and Science, Vadlamudi, Andhra Pradesh, India. His research interests include data engineering, machine learning, intelligent information systems, software analytics, and large language models. He has published research articles on LLM based financial query analysis. His research focuses on applying data driven and AI based techniques to real world problems in knowledge discovery and decision support systems, with an emphasis on integrating modern machine learning methods with scalable data processing frameworks.

**Krishnaveni Kaki** is currently working as an Assistant Professor in the Department of Information Technology at Vignan's Lara Institute of Technology and Science, Vadlamudi, Andhra Pradesh, India. She received her MCA degree. Her research interest include Computer Science and Engineering, Emerging Technologies, and Software Application Development. Her research focuses on Research and development of innovative computing solutions to address academic, industrial, and societal challenges. She has published research papers in reputed national and international journals and conferences including IEEE.

**Kesineni Bharath** is currently pursuing his Bachelor's degree in Information Technology at Vignan's Lara Institute of Technology and Science, Vadlamudi, Andhra Pradesh, India. His research interests include data engineering, knowledge representation, machine learning, intelligent information systems, and large language models. He is particularly interested in the development of scalable data driven architectures and AI based frameworks for knowledge discovery, semantic retrieval, and decision support systems. His academic work emphasizes improving information retrieval effectiveness, enhancing factual consistency in intelligent systems, and designing robust reasoning and validation mechanisms. He also explores the integration of modern machine learning techniques with efficient data processing pipelines to support knowledge intensive and real world intelligent applications.

**Annasureddy Iswarya** is pursuing her Bachelor's degree in Information Technology from Vignan's Lara Institute of Technology and Science, Vadlamudi, Andhra Pradesh, India. Her research interests include data analytics, machine learning, knowledge discovery, and intelligent information systems. Experienced in developing predictive analytics and machine learning solutions for structured and unstructured data through academic projects. Currently focused on building AI and machine learning solutions for real world data driven applications, with emphasis on predictive analytics and intelligent system development.

**Harini Kanna** is currently pursuing a Bachelor of Technology degree in Information Technology at Vignan's Lara Institute of Technology and Science, Andhra Pradesh, India. She possesses a strong foundation in software development, data analytics, and web technologies, with proficiency in Python, Java, SQL, and Power BI. She has completed virtual internships in full stack development and software engineering, where she gained hands on experience in building scalable MERN stack applications, developing secure RESTful APIs, and implementing robust backend architectures. Her project experience includes developing a full stack freelance marketplace platform with user authentication, role based dashboards, and

database integration. Her areas of interest include full stack development, cybersecurity, data analytics, and AI driven intelligent systems for real world problem solving.

**Chalamala Gargesh** is currently pursuing a Bachelor of Technology degree in Information Technology at Vignan's Lara Institute of Technology and Science, Andhra Pradesh, India. He has a strong foundation in Python, web technologies, databases, and cloud platforms. He has completed a virtual internship in Artificial Intelligence and IBM Cloud, gaining hands on experience in cloud deployment, AI workflows, and real world data applications. His project experience includes developing dynamic web applications using the LEMP stack and building a smart campus conversational system using Large Language Models and Retrieval Augmented Generation. His research interests include conversational AI, cloud based intelligent systems, and applied machine learning for real world applications.
