# Supplementary material
Source: Research Square preprint supplement (doi:10.21203/rs.3.rs-9287246/v1)
Supplement: Supplementary file 3 [file efa8898f0f629e38831e9fb8.pdf]

## HIGHLIGHTS

- A knowledge centric conversational framework is proposed for academic and campus information access.
- OCR based knowledge acquisition enables integration of scanned and heterogeneous institutional documents.
- OCR based knowledge acquisition enables integration of scanned and heterogeneous institutional documents.
- Retrieval augmented response generation enhances factual grounding in institutional information sources.
- Validation and reasoning mechanisms improve response reliability and reduce hallucinated outputs.
